# Supplementary material for: Synthesis of Co9S8nanoflakes by a one-step solvent-free solid-state method for multiple electrocatalytic reactions
Source: Royal Society of Chemistry journal article supplement (doi:10.1039/d3qi00112a), 2023-01-01
Supplement: d3qi00112a1.pdf [file d3qi00112a1.pdf]

## Supporting Information

### **Synthesis of Co<sub>9</sub>S<sub>8</sub> nanoflakes by one-step solvent-free solid-state method for multiple electrocatalytic reactions**

Peifeng Yu<sup>a</sup>, Lingyong Zeng<sup>a</sup>, Kuan Li<sup>a</sup>, Chao Zhang<sup>a</sup>, Kangwang Wang<sup>a</sup>, Longfu Li<sup>a</sup>,

Ying Liang<sup>b</sup>, Kai Yan<sup>c</sup>, Huixia Luo<sup>a\*</sup>

*<sup>a</sup> School of Materials Science and Engineering, State Key Laboratory of Optoelectronic Materials and Technologies, Key Lab of Polymer Composite & Functional Materials, Guangzhou Key Laboratory of Flexible Electronic Materials and Wearable Devices, Sun Yat-Sen University, Guangzhou 510275, P. R. China*

*<sup>b</sup> Basic course department, Guangzhou Maritime University, Guangzhou 510725, P. R. China*

*<sup>c</sup> School of Environmental Science and Engineering, Sun Yat-Sen University, Guangzhou 510275, P. R. China*

\* Corresponding author, E-mail: luohx7@mail.sysu.edu.cn

## Experimental section

**Chemicals:** Cobalt power was purchased from Alfa Aesar. RuO<sub>2</sub> (99.9% metals basis), Sulfur power (99.99% metals basis), and CoCl • 6H<sub>2</sub>O (AR) were purchased from Aladdin. Urea (AR, 99%), Pt/C (20%), and Na<sub>2</sub>S • 9H<sub>2</sub>O (AR, ≥ 98.0%) were obtained from Shanghai Macklin Biochemical Co., Ltd. Commercial active carbon YP-50 was obtained from Toray.

**Turnover frequency (TOF) calculation:** The per-site TOF values were calculated based on the following equation:

$$\text{TOF} = \frac{\text{total hydrogen turnover} / \text{cm}^{-2} \text{ geometric area}}{\text{number of active sites} / \text{cm}^{-2} \text{ geometric area}}$$

The total number of hydrogen turnovers was calculated from the current density according to the:

$$\text{no. of H}_2 = \left[ j \frac{\text{mA}}{\text{cm}^2} \right] \left[ \frac{1 \text{ C s}^{-1}}{1000 \text{ mA}} \right] \left[ \frac{1 \text{ mol e}^{-1}}{96485.3 \text{ C}} \right] \left[ \frac{1 \text{ mol H}_2}{2 \text{ mol e}^{-1}} \right] \left[ \frac{6.02 \times 10^{23} \text{ molecules H}_2}{1 \text{ mol H}_2} \right] = 3.12 \times 10^{15} \frac{\text{H}_2 \text{ s}^{-1}}{\text{cm}^2} \text{ per } \frac{\text{mA}}{\text{cm}^2}$$

Considering that it was difficult to determine the exact quantity of active sites on the catalyst surface, the total number of surface Co sites was assumed as the number of active sites according to the reference. The molar volume of Co was obtained by the equation of the molar mass of Co divided by the density of Co, and thus the molar volume of Co is determined to be 6.62 cm<sup>3</sup> mol<sup>-1</sup>. The average surface atoms per 1 square centimeter could be required by the following equation<sup>[1]</sup>:

$$\text{surface sites} = \left[ \frac{1 \times 6.02 \times 10^{23} \text{ atoms}}{1 \text{ mol}} \right] \times \frac{1 \text{ mol}}{6.62 \text{ cm}^3} = 2.02 \times 10^{15} \frac{\text{atoms}}{\text{cm}^2}$$

Thus, the current density from the LSV polarization curves can be converted into the TOF values according to the following equation:

$$\text{TOF} = \frac{\left[ 3.12 \times 10^{15} \frac{\text{H}_2 \text{ s}^{-1}}{\text{cm}^2} \text{ per } \frac{\text{mA}}{\text{cm}^2} \right] \times |j|}{\text{surface sites} \times A_{\text{ECSA}}}$$

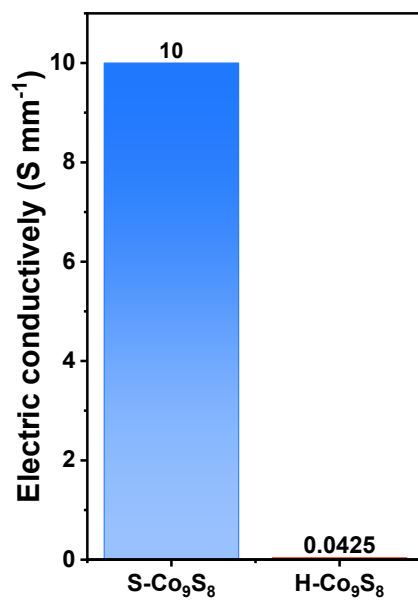

**Figure S1.** Values of electronic conductivity for S-Co<sub>9</sub>S<sub>8</sub> and H-Co<sub>9</sub>S<sub>8</sub>.

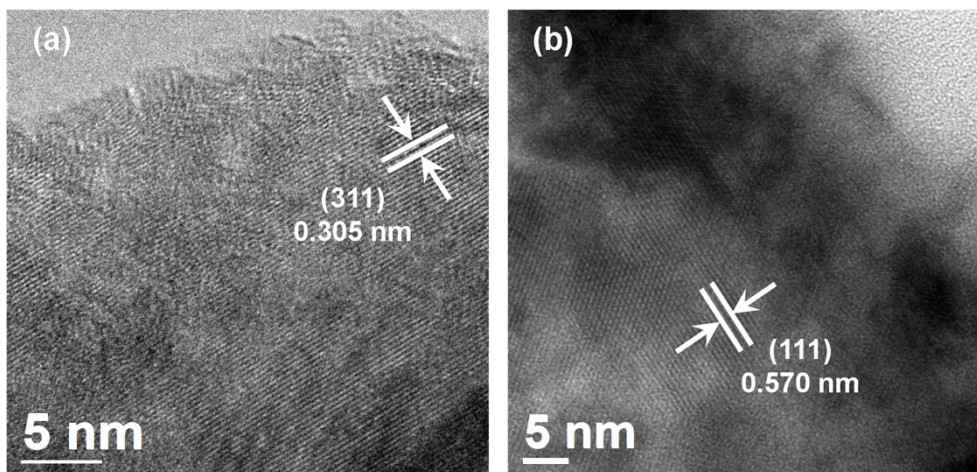

**Figure S2.** HRTEM images of (a) S-Co<sub>9</sub>S<sub>8</sub> and (b) H-Co<sub>9</sub>S<sub>8</sub>.

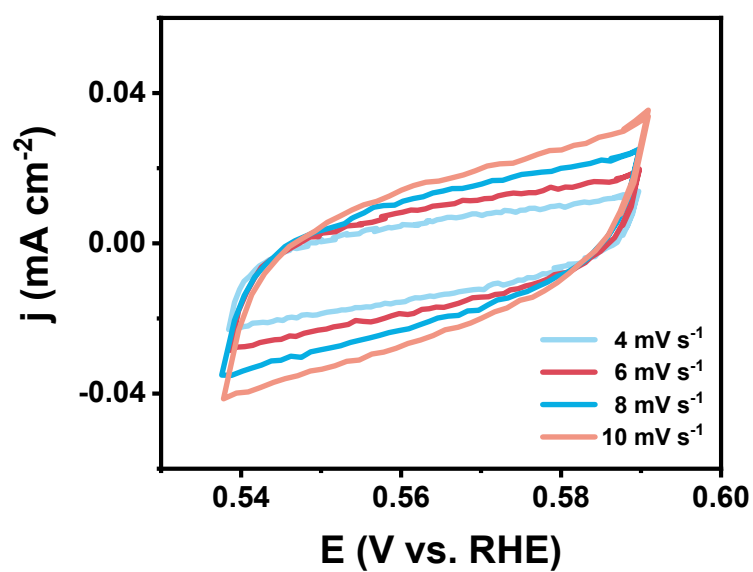

**Figure S3.** CV curves of S-Co<sub>9</sub>S<sub>8</sub> at different sweep rates in 0.5 M H<sub>2</sub>SO<sub>4</sub>.

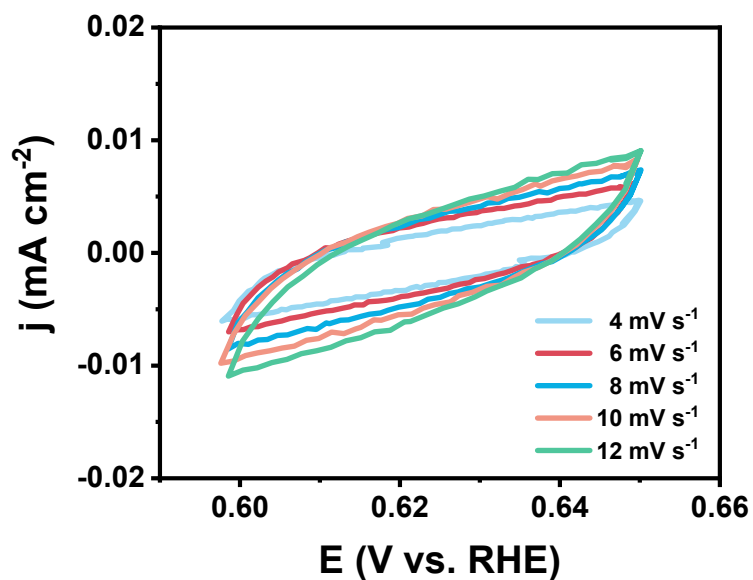

**Figure S4.** CV curves of H-Co<sub>9</sub>S<sub>8</sub> at different sweep rates in 0.5 M H<sub>2</sub>SO<sub>4</sub>.

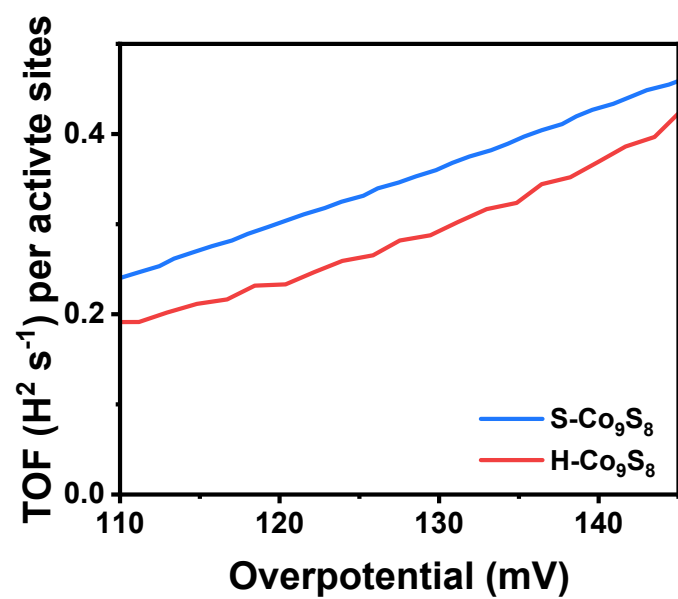

**Figure S5.** TOF values of S-Co<sub>9</sub>S<sub>8</sub> and H-Co<sub>9</sub>S<sub>8</sub> electrodes.

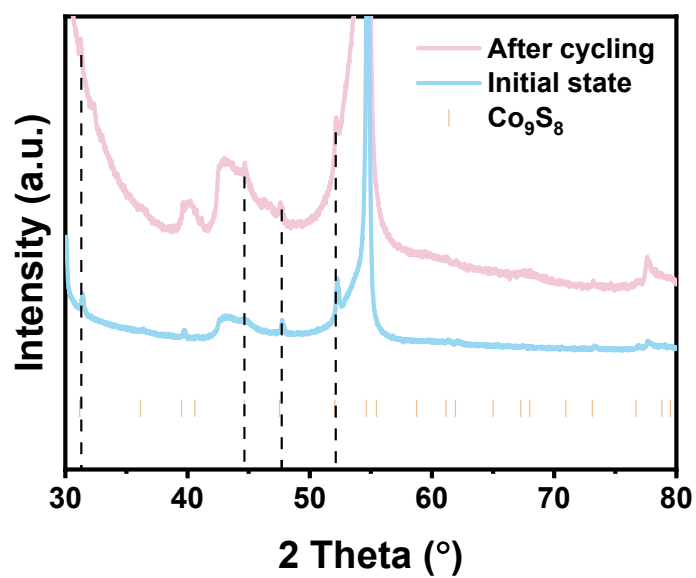

**Figure S6.** XRD patterns of S-Co<sub>9</sub>S<sub>8</sub> before and after the cycling stability test in acidic HER.

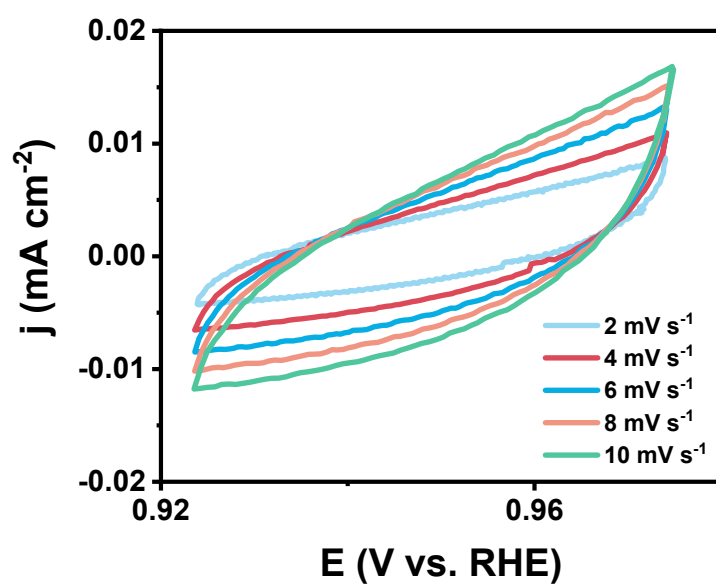

**Figure S7.** CV curves of S-Co<sub>9</sub>S<sub>8</sub> at different sweep rates in 1 M KOH.

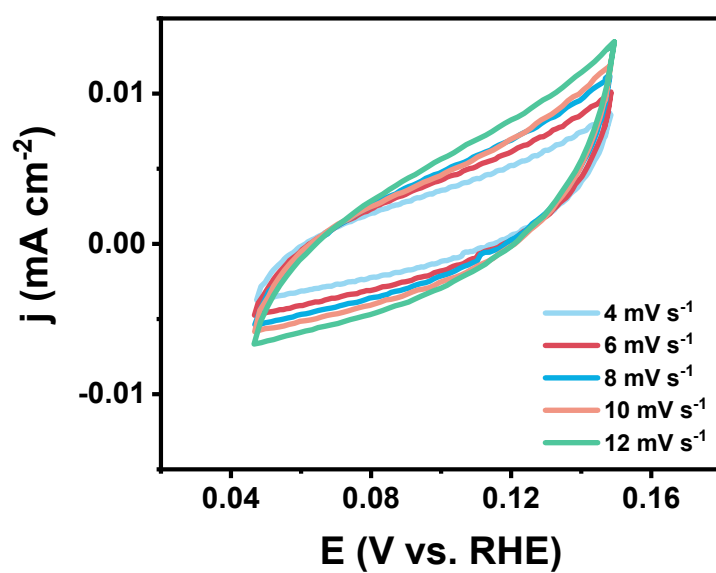

**Figure S8.** CV curves of H-Co<sub>9</sub>S<sub>8</sub> at different sweep rates in 1 M KOH.

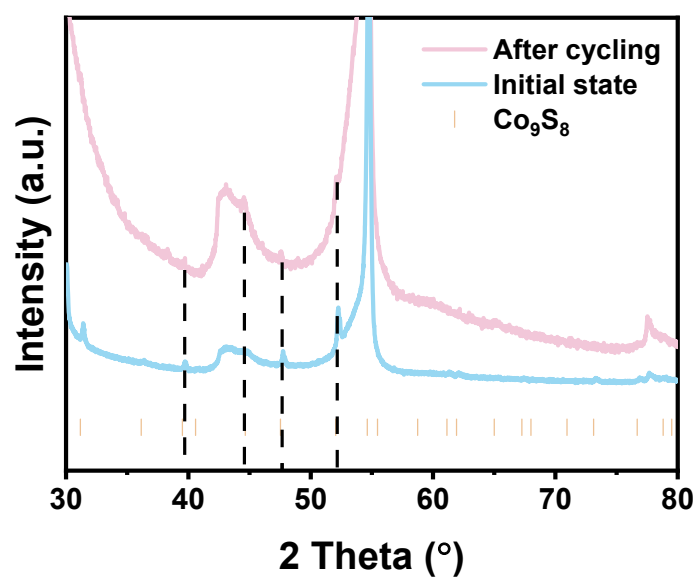

**Figure S9.** XRD patterns of S-Co<sub>9</sub>S<sub>8</sub> before and after the alkaline OER test.

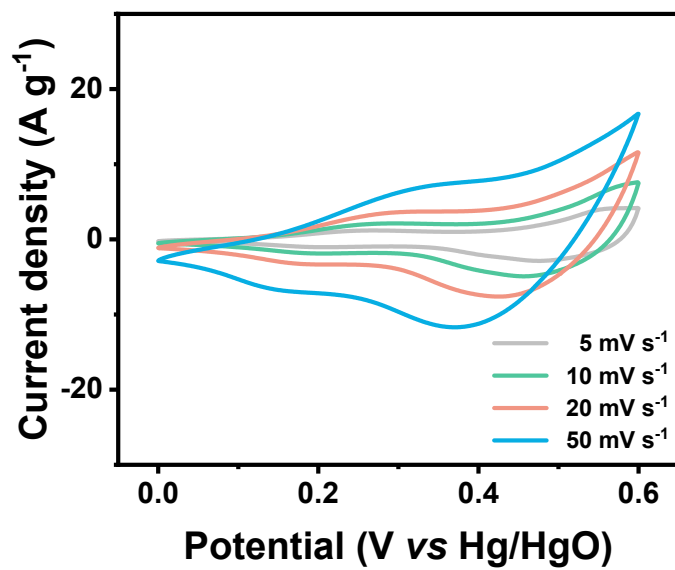

**Figure S10.** CV curves of H-Co<sub>9</sub>S<sub>8</sub> measured in 1M KOH at the range of current densities between 5 – 50 mV s<sup>-1</sup>.

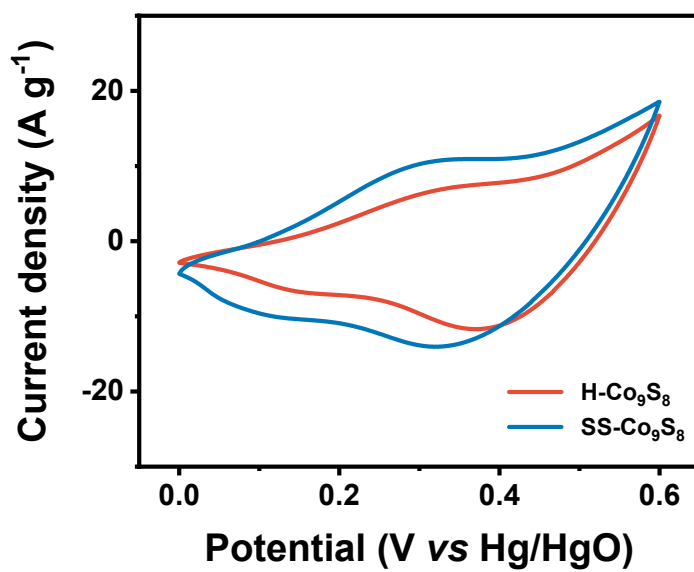

**Figure S11.** The comparison of CV curves was measured at  $50 \text{ mV s}^{-1}$  for S- $\text{Co}_9\text{S}_8$  and H- $\text{Co}_9\text{S}_8$ .

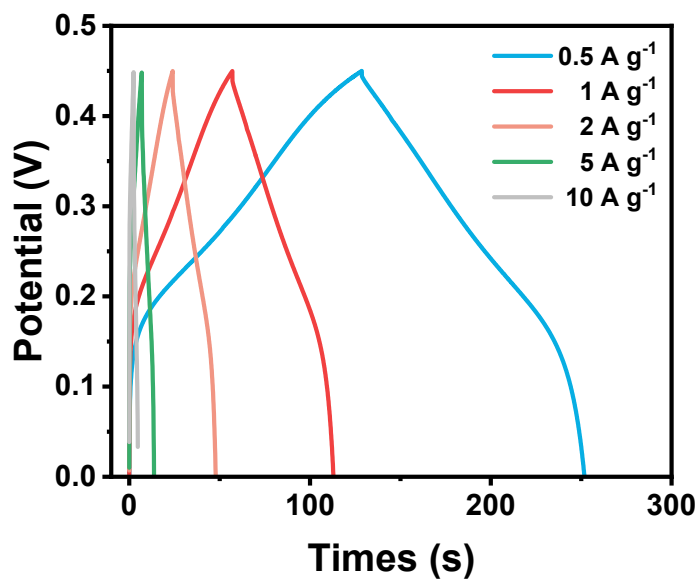

**Figure S12.** GCD curves under various current densities of the H- $\text{Co}_9\text{S}_8$  electrode by using  $1 \text{ mol L}^{-1}$  KOH aqueous electrolyte.

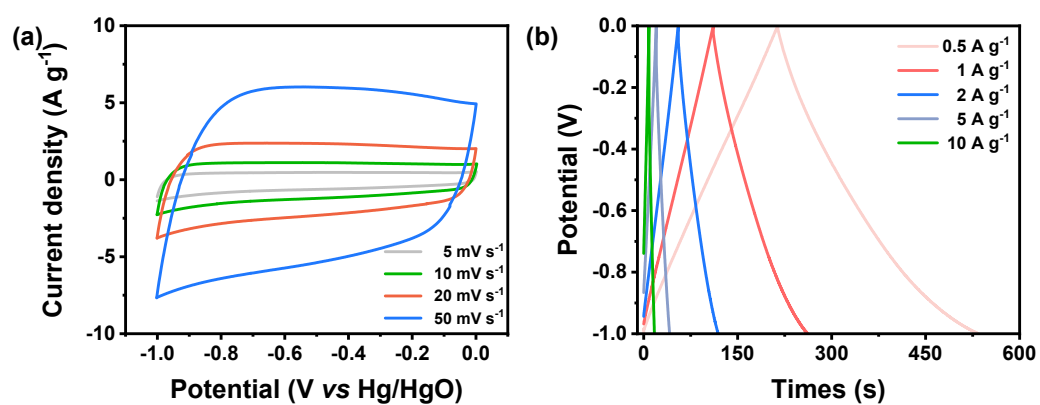

**Figure S13.** CV curves and GCD curves of the YP-50 electrode by using 1 mol L<sup>-1</sup> KOH aqueous electrolyte.

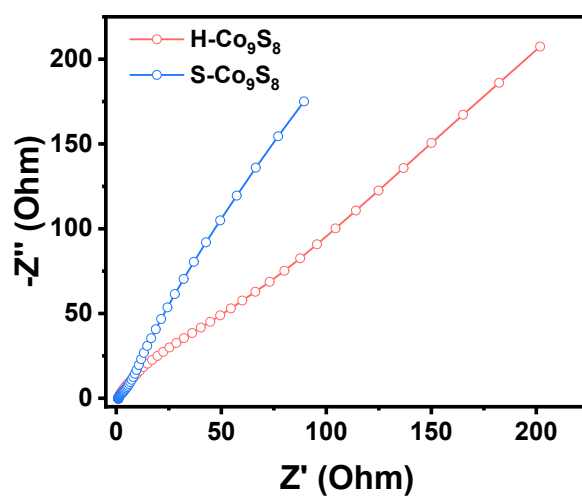

**Figure S14.** Nyquist plots for S-Co<sub>9</sub>S<sub>8</sub> and H-Co<sub>9</sub>S<sub>8</sub>.

**Table S1.** Structural parameters of S-Co<sub>9</sub>S<sub>8</sub>. The space group is Fm-3m (No. 225), a = b = c = 9.93 Å.

| Atom    | <i>x</i> | <i>y</i> | <i>z</i> | Occupancy |
|---------|----------|----------|----------|-----------|
| Co1(Co) | 0.5      | 0.5      | 0.5      | 1.0       |
| Co2(Co) | 0.126087 | 0.126087 | 0.126087 | 1.0       |
| S1(S)   | 0.25     | 0.25     | 0.25     | 1.0       |
| S2(S)   | 0.277277 | 0.0      | 0.0      | 1.0       |

**Table S2.** Structural parameters of H-Co<sub>9</sub>S<sub>8</sub>. The space group is Fm-3m (No. 225), a = b = c = 8.52 Å.

| Atom    | <i>x</i> | <i>y</i> | <i>z</i> | Occupancy |
|---------|----------|----------|----------|-----------|
| Co1(Co) | 0.5      | 0.5      | 0.5      | 1.0       |
| Co2(Co) | 0.12623  | 0.12623  | 0.12623  | 1.0       |
| S1(S)   | 0.25     | 0.25     | 0.25     | 1.0       |
| S2(S)   | 0.26230  | 0.0      | 0.0      | 1.0       |

**Table S3.** Comparison of Tafel slope and overpotential ( $\eta$ ) for S-Co<sub>9</sub>S<sub>8</sub> and other Co<sub>9</sub>S<sub>8</sub>-based acidic HER electrocatalysis.

| Materials                                             | $\eta$ at 10 mA cm <sup>-2</sup><br>(mV vs RHE) | Reference                                                 |
|-------------------------------------------------------|-------------------------------------------------|-----------------------------------------------------------|
| Co <sub>9</sub> S <sub>8</sub> @C                     | 240                                             | <i>ACS Appl. Mater. Interfaces</i> , 2015, 7, 980–988     |
| Co <sub>9</sub> S <sub>8</sub> /NC@MoS <sub>2</sub>   | 117                                             | <i>ACS Appl. Mater. Interfaces</i> , 2017, 9, 28394–28405 |
| Co <sub>9</sub> S <sub>8</sub> -MoS <sub>2</sub> HNBs | 106                                             | <i>Chem.–Asian J.</i> , 2018, 13, 413–420                 |
| Co <sub>9</sub> S <sub>8</sub> @MoS <sub>x</sub> /CC  | 98                                              | <i>Nano Energy</i> , 2017, 32, 470–478                    |

|                                                            |      |                                                          |
|------------------------------------------------------------|------|----------------------------------------------------------|
| Co <sub>9</sub> S <sub>8</sub> /1L MoS <sub>2</sub> (3.5%) | 97   | <i>Adv. Mater.</i> , 2018, 30, 1707301                   |
| Fe-Co <sub>9</sub> S <sub>8</sub> NSs/CC                   | 65   | <i>Electrochim. Acta</i> , 2018, 264, 157–165            |
| Co <sub>9</sub> S <sub>8</sub> /WS <sub>2</sub>            | 138  | <i>J. Mater. Chem. A</i> , 2017, 5, 23361–23368          |
| Co <sub>9</sub> S <sub>8</sub> /CNFs                       | 165  | <i>Part. Part. Syst. Charact.</i> , 2017, 34, 1700189    |
| Co <sub>9</sub> S <sub>8</sub> @MoS <sub>2</sub> - 750     | 171  | <i>ACS Appl. Mater. Interfaces</i> , 2018, 10, 1678–1689 |
| S-Co <sub>9</sub> S <sub>8</sub>                           | 96.3 | This work                                                |

#### Reference:

[1] H. Sun, Z. Yan, C. Tian, C. Li, X. Feng, R. Huang, Y. Lan, J. Chen, C. Li, Z. Zhang, M. Du, Bixbyite-type Ln<sub>2</sub>O<sub>3</sub> as promoters of metallic Ni for alkaline electrocatalytic hydrogen evolution, *Nat. Commun.* , 2022, **13**, 3857.
